# Supplementary material for: Deep-red and near-infrared light-emitting electrochemical cells employing perovskite color conversion layers with EQE >10%
Source: Royal Society of Chemistry journal article supplement (doi:10.1039/d2tc03813g), 2022-01-01
Supplement: d2tc03813g1.pdf [file d2tc03813g1.pdf]

## ***Supporting Information***

### **Deep-red and near-infrared light-emitting electrochemical cells employing perovskite color conversion layers with EQE >10%**

Yi-Hua Su,<sup>a,+</sup> Yan-Cheng Ji,<sup>b,+</sup> Yu-Ting Huang,<sup>c</sup> Dian Luo,<sup>a</sup> Shun-Wei Liu,<sup>e</sup> Zu-Po Yang,<sup>\*,b</sup> Chin-Wei Lu,<sup>\*,c</sup> Chih-Hao Chang,<sup>\*,d</sup> Hai-Ching Su<sup>\*,a</sup>

<sup>a</sup> *Institute of Lighting and Energy Photonics, National Yang Ming Chiao Tung University, Tainan 71150, Taiwan*

<sup>b</sup> *Institute of Photonic System, National Yang Ming Chiao Tung University, Tainan 71150, Taiwan*

<sup>c</sup> *Department of Applied Chemistry, Providence University, Taichung 43301, Taiwan*

<sup>d</sup> *Department of Electrical Engineering, Yuan Ze University, Taoyuan, 32003, Taiwan.*

<sup>e</sup> *Department of Electronic Engineering, Ming Chi University of Technology, New Taipei City 24301, Taiwan*

<sup>+</sup> *Equal contribution*

To whom to correspond:

E-mail: [haichingsu@nycu.edu.tw](mailto:haichingsu@nycu.edu.tw); Tel: +886-6-3032121-57792 (Hai-Ching Su)

E-mail: [zupoyang@nctu.edu.tw](mailto:zupoyang@nctu.edu.tw); Tel: +886-6-3032121-57762 (Zu-Po Yang)

E-mail: [cwlu@pu.edu.tw](mailto:cwlu@pu.edu.tw); Tel: +886-4-26328001-15213 (Chin-Wei Lu)

E-mail: [chc@saturn.yzu.edu.tw](mailto:chc@saturn.yzu.edu.tw); Tel: +886-3-4638800-7517 (Chih-Hao Chang)

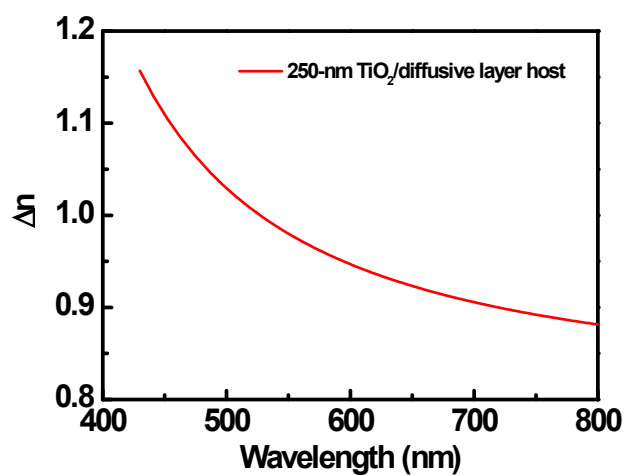

**Fig. S1** Refractive index difference between 250-nm TiO<sub>2</sub> NPs and the diffusive layer host.

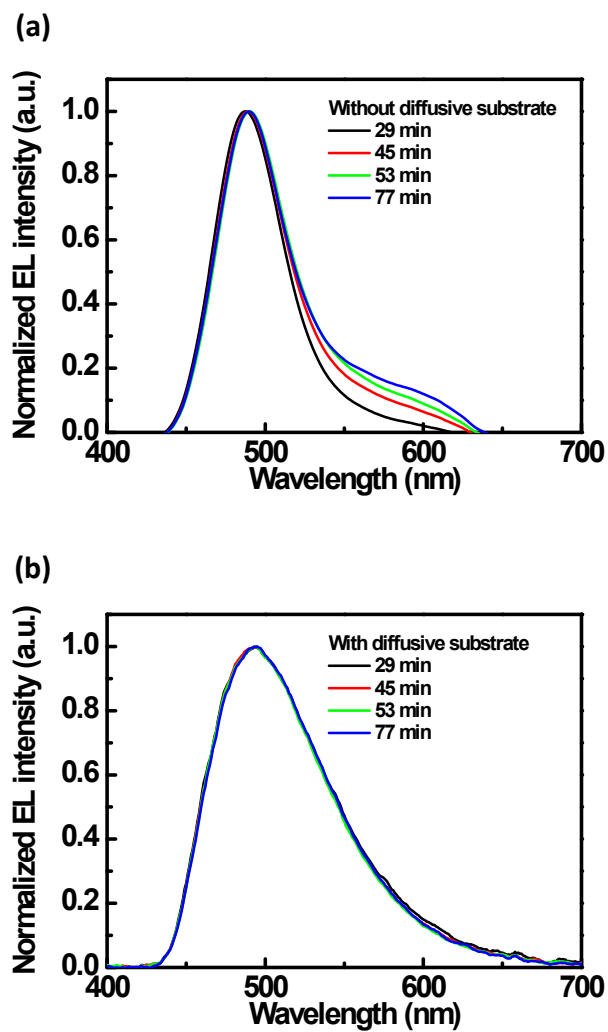

**Fig. S2** Time-dependent EL spectra for the LECs based on complex **1** (a) without and (b) with the diffusive substrates under a constant current ( $0.05 \mu\text{A}$ ).

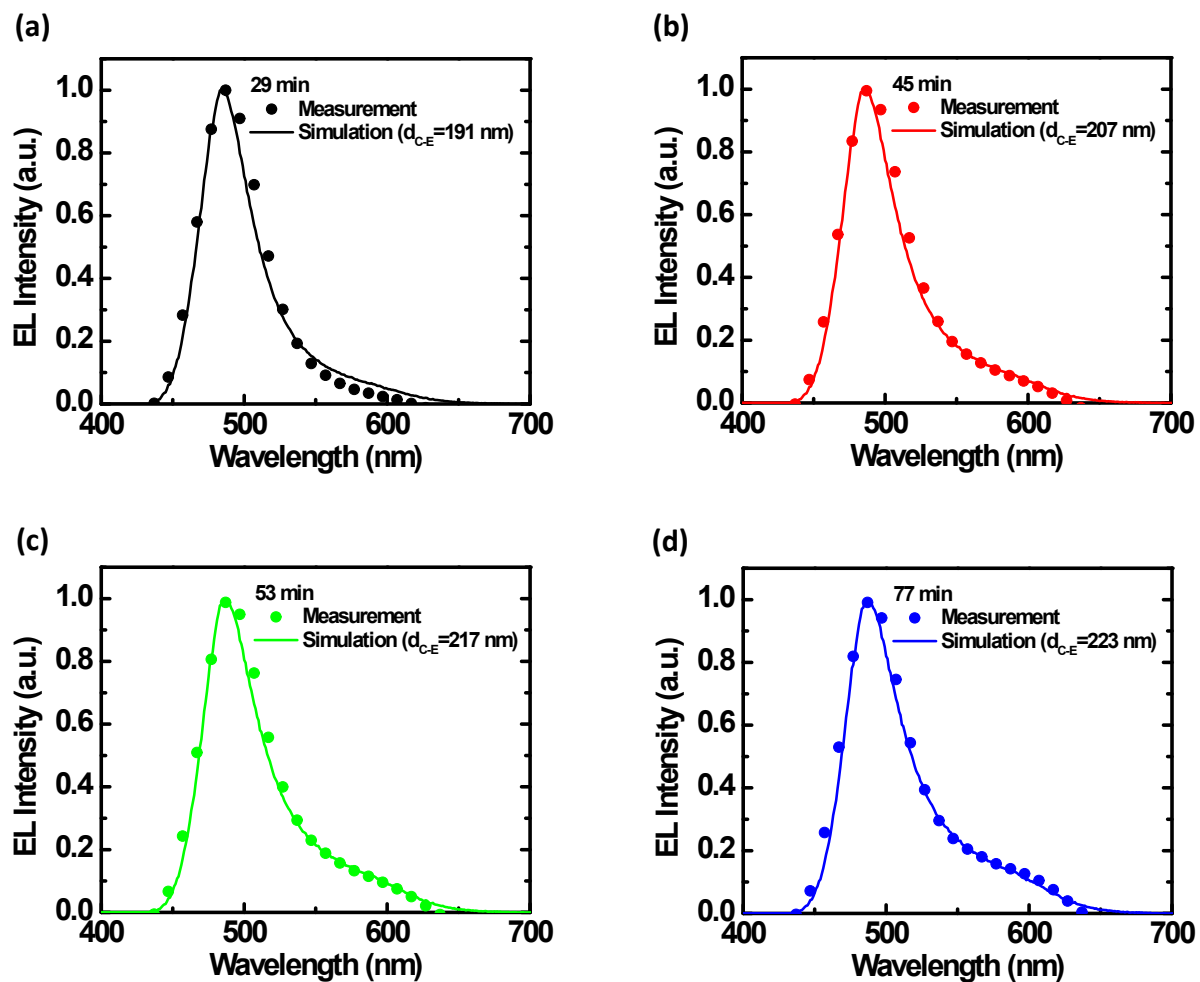

**Fig. S3** Simulated (line) and measured (solid symbol) EL spectra of the LECs based on complex **1** without the diffusive substrates under a constant current ( $0.05 \mu\text{A}$ ) at (a) 29, (b) 45, (c) 53, and (d) 77 min after the device driving started. The emissive-layer thickness is 530 nm and the emission zone position from cathode ( $d_{C-E}$ ) employed for simulation is labeled on each subfigure.

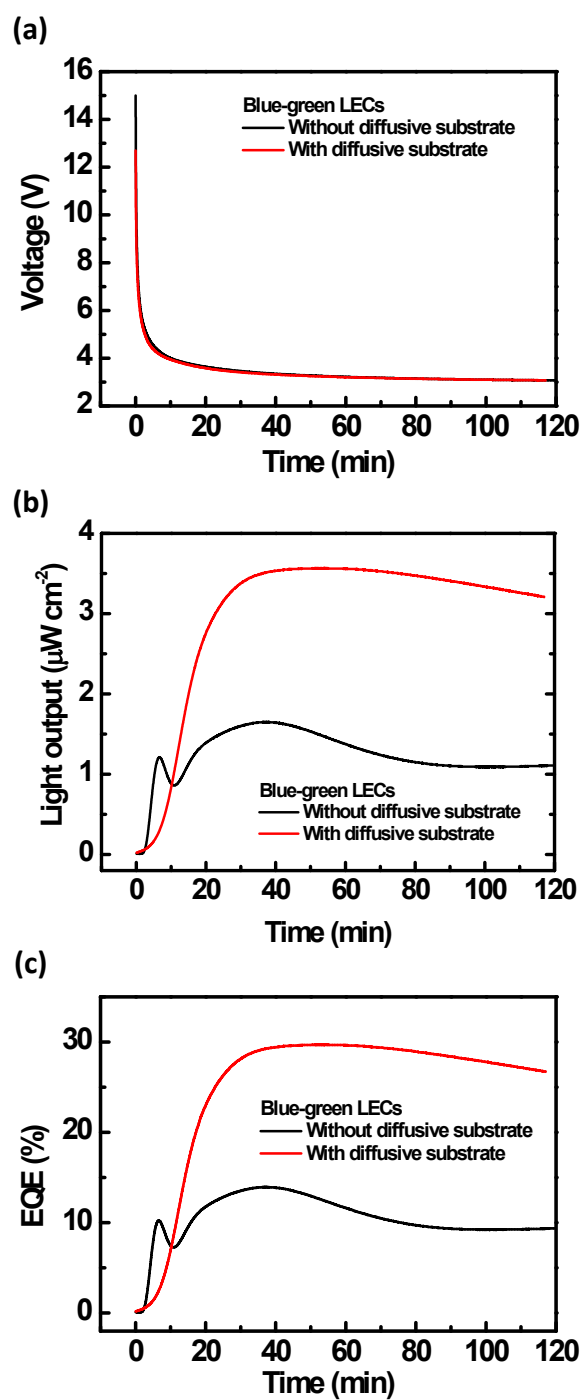

**Fig. S4** Time-dependent (a) voltage, (b) light output, and (c) EQE of the LECs based on complex **1** without and with the diffusive substrates under a constant current ( $0.05 \mu\text{A}$ ).

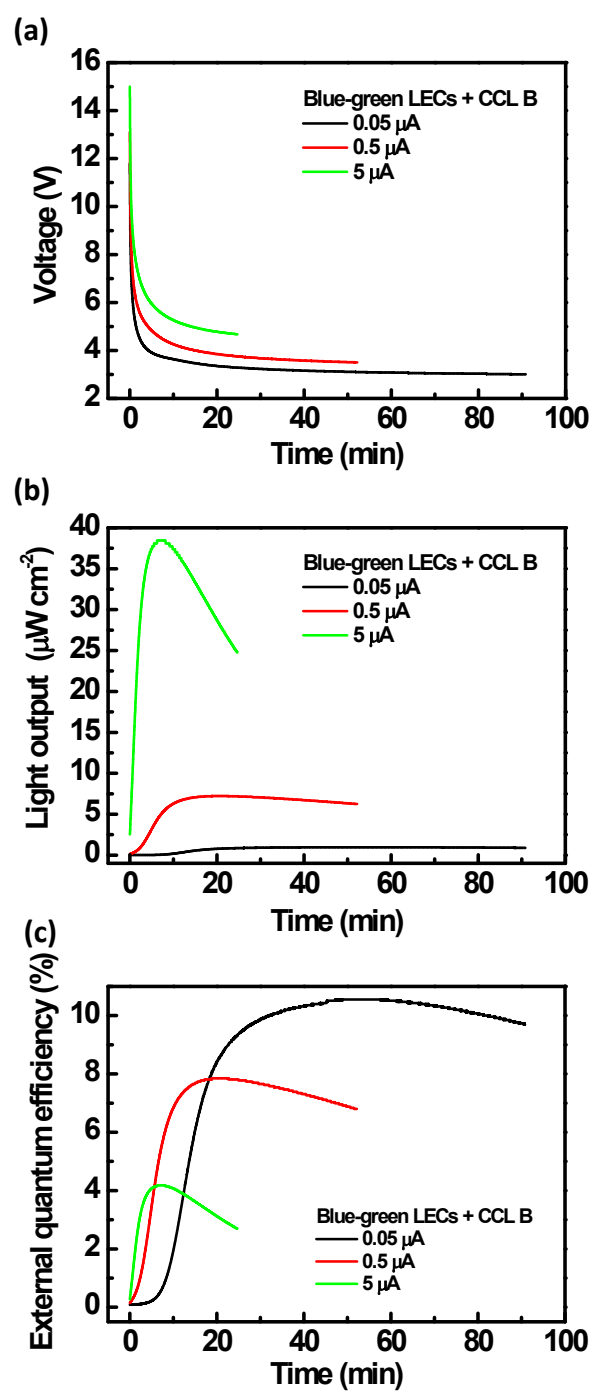

**Fig. S5** Time-dependent (a) voltage, (b) light output, and (c) EQE of the blue-green LEDs integrated with perovskite CCL **B** under constant currents (0.05, 0.5, and 5  $\mu\text{A}$ ).

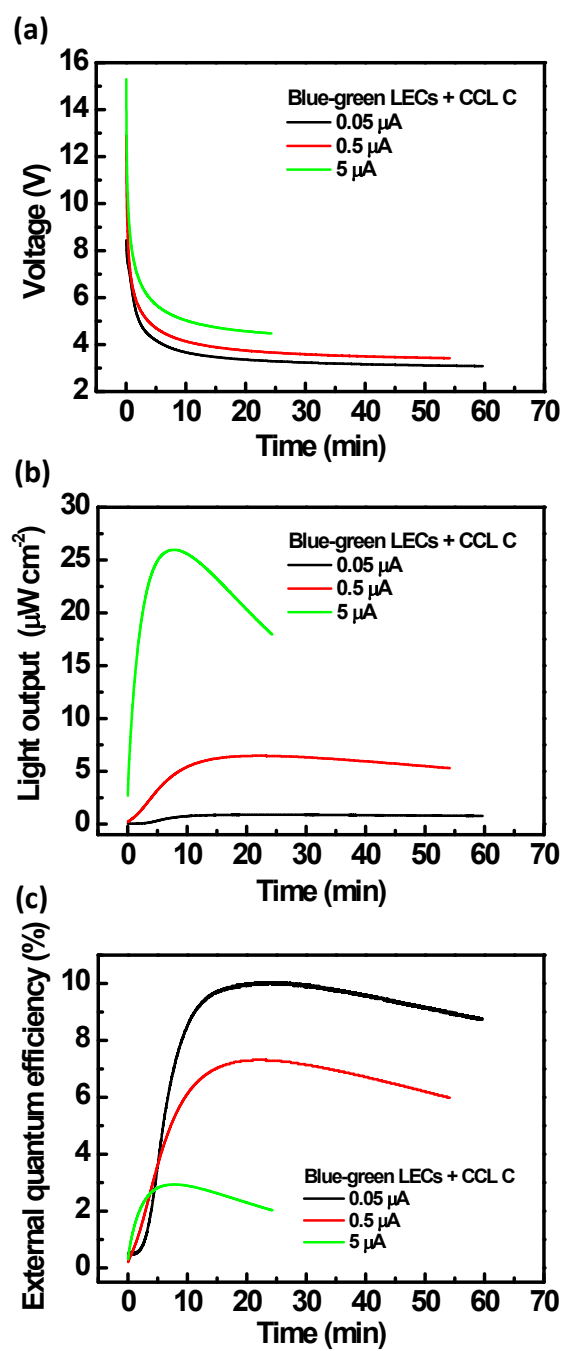

**Fig. S6** Time-dependent (a) voltage, (b) light output, and (c) EQE of the blue-green LEDs integrated with perovskite CCL C under constant currents (0.05, 0.5, and 5  $\mu\text{A}$ ).
